# Supplementary material for: Graphene-decorated silica stabilized stearic acid as a thermal energy storage material
Source: Royal Society of Chemistry journal article supplement (doi:10.1039/c7ra05204a), 2017-01-01
Supplement: c7ra05204a1.pdf [file c7ra05204a1.pdf]

## Supplementary Information

### Graphene-decorated silica stabilized stearic acid as thermal energy storage material

Chuanchang Li \*, Baoshan Xie, Jian Chen \*

*Key Laboratory of Renewable Energy Electric-Technology of Hunan Province, School of Energy and Power Engineering, Changsha University of Science and Technology, Changsha 410114,*

*China. E-mail: chuanchangli@csust.edu.cn; chenjian\_513@126.com;*

**Table S1** Thermal properties of the SA<sup>+</sup>/SG<sub>5</sub> and SA<sup>++</sup>/SG<sub>5</sub> composites.

| Samples                           | Loadage<br>( $\beta$ , %) | Melting<br>temperature<br>( $T_m$ , °C) | Freezing<br>temperature ( $T_f$ ,<br>°C) | Latent<br>heat of<br>meltin<br>g<br>( $\Delta H_m$ ,<br>J g <sup>-1</sup> ) | Latent heat<br>of freezing<br>( $\Delta H_f$ , J g <sup>-1</sup> ) | Theoretic<br>values of<br>$\Delta H_m$ ( $\Delta H_{th}$ ,<br>J g <sup>-1</sup> ) | Crystalli<br>nity of<br>SA ( $F_c$ ,<br>%) | Efficient<br>energy per<br>unit mass<br>of SA<br>( $E_{ef}$ , J g <sup>-1</sup> ) |
|-----------------------------------|---------------------------|-----------------------------------------|------------------------------------------|-----------------------------------------------------------------------------|--------------------------------------------------------------------|-----------------------------------------------------------------------------------|--------------------------------------------|-----------------------------------------------------------------------------------|
| SA                                | 100                       | 54.11                                   | 53.22                                    | 177.3                                                                       | 173.8                                                              | ---                                                                               | 100                                        | ---                                                                               |
| SA <sup>+</sup> /SG <sub>5</sub>  | 39.5                      | 43.88/51.92                             | 47.19/50.67                              | 60.40                                                                       | 59.14                                                              | 70.03                                                                             | 86.25                                      | 152.9                                                                             |
| SA <sup>++</sup> /SG <sub>5</sub> | 44.8                      | 45.68/52.58                             | 47.35/52.08                              | 70.25                                                                       | 68.80                                                              | 79.43                                                                             | 88.44                                      | 156.8                                                                             |

Note:  $\Delta H_{th} = \Delta H_{pure} \times \beta$ ;  $E_{ef} = \Delta H_{pure} \times F_c$

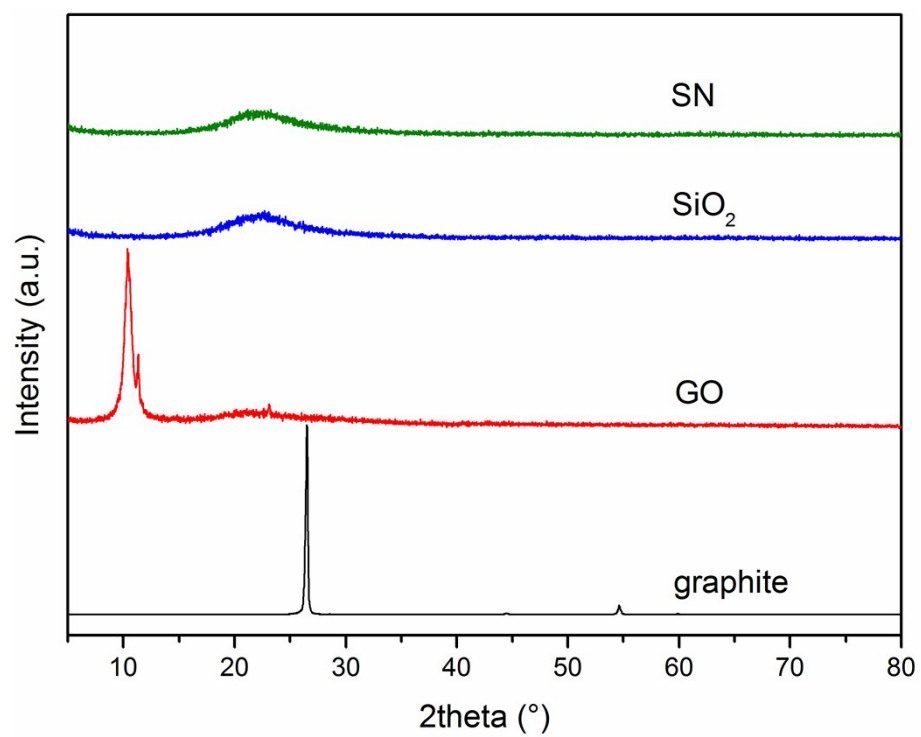

**Figure S1** XRD patterns of the graphite, GO, SiO<sub>2</sub>, and SN.

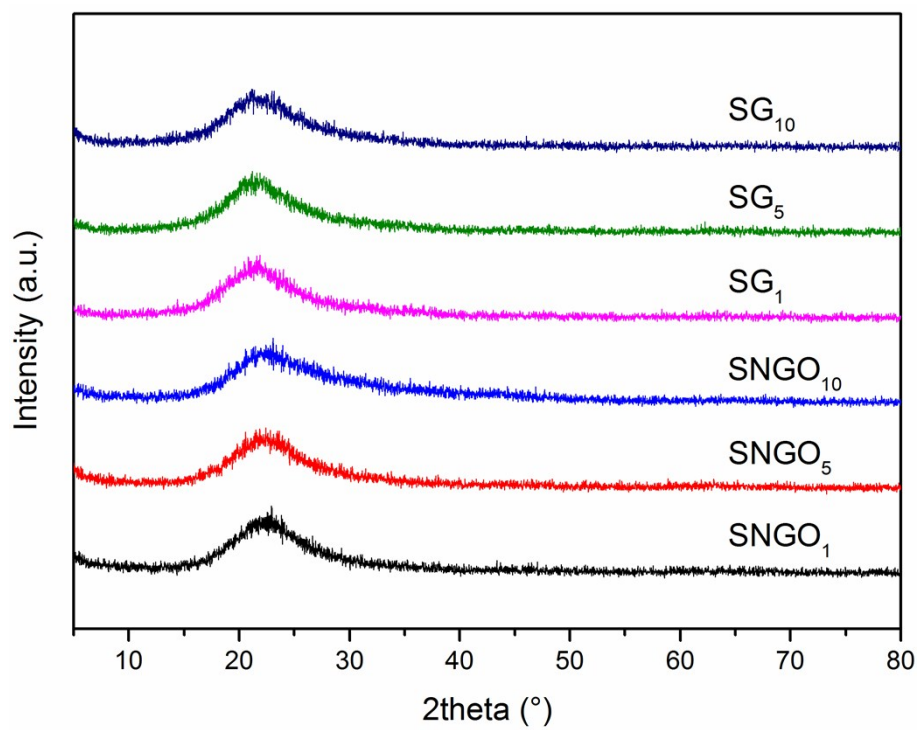

**Figure S2** XRD patterns of the SNGO and SG.

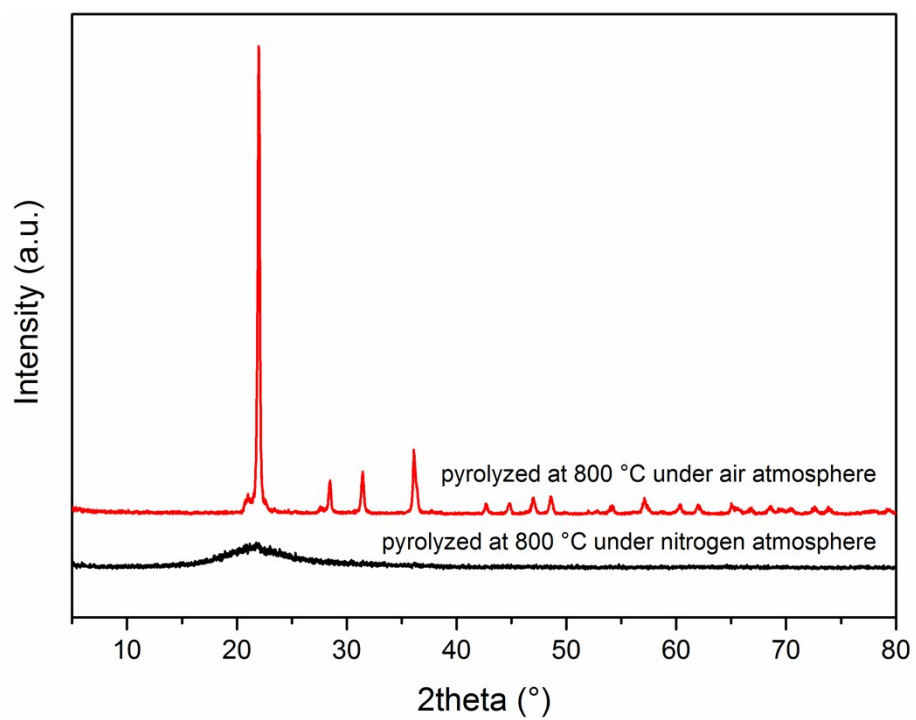

**Figure S3** XRD patterns of the SiO<sub>2</sub> pyrolyzed at 800 °C under nitrogen atmosphere and air atmosphere, respectively.

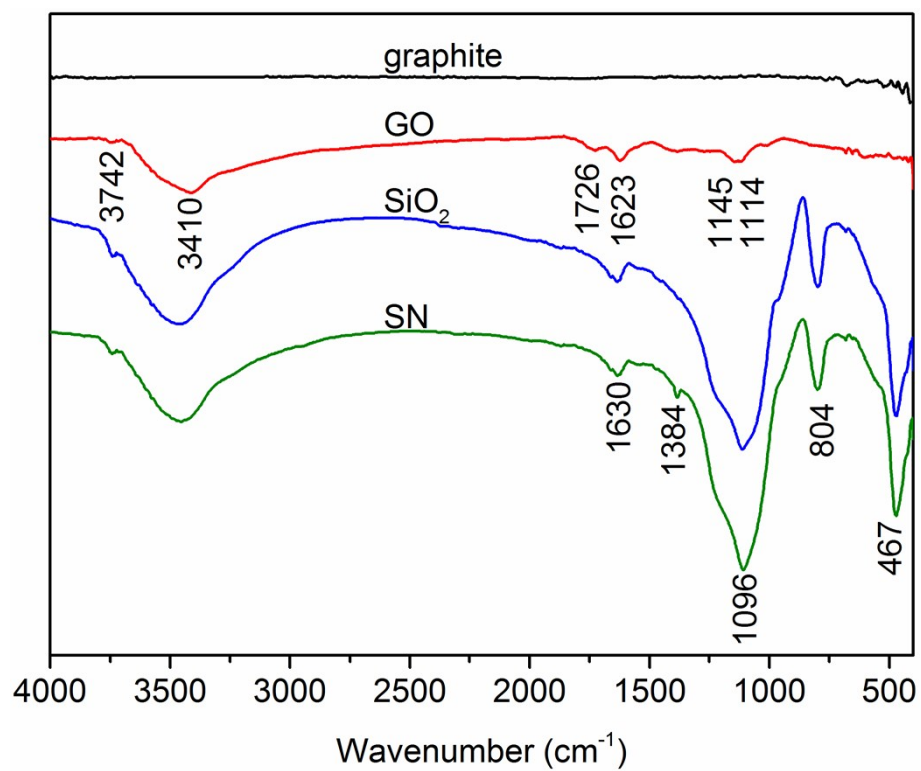

**Figure S4** FTIR spectra of the graphite, GO, SiO<sub>2</sub>, and SN.

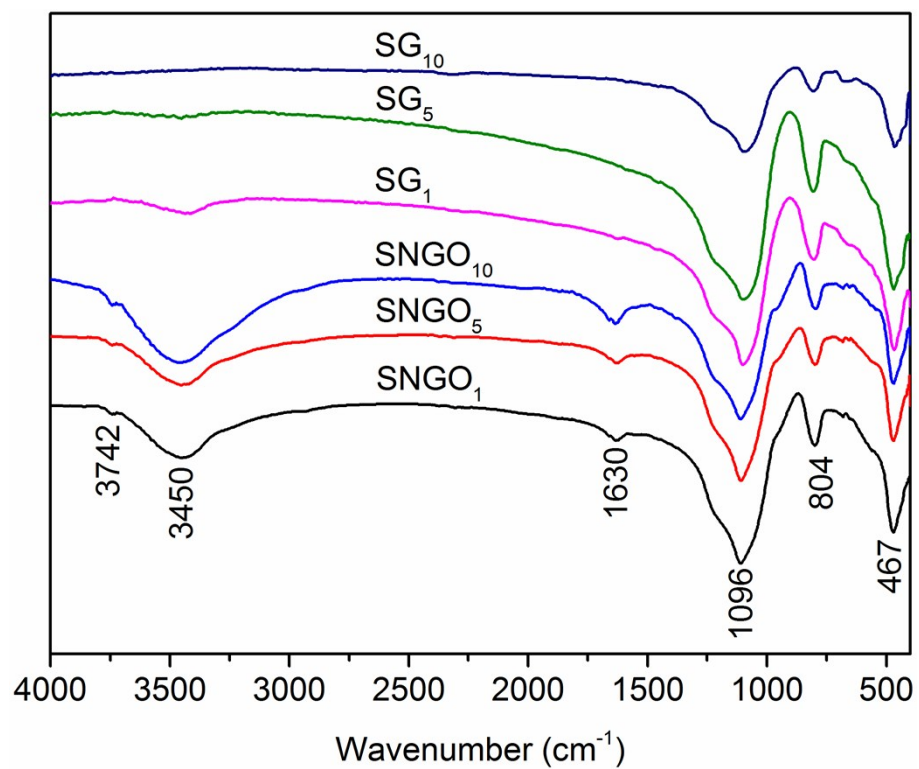

**Figure S5** FTIR spectra of the SNGO and SG.

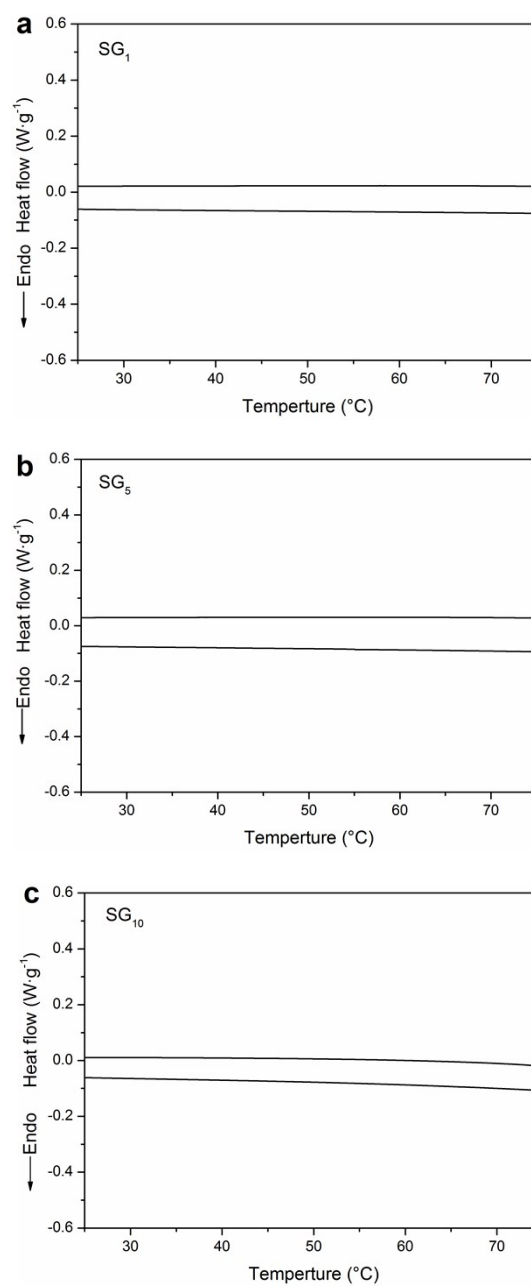

**Figure S6** DSC curves of the  $\text{SG}_1$ ,  $\text{SG}_5$ , and  $\text{SG}_{10}$ .
